# Supplementary figures and images for: Using Serum Cystatin C to Predict Acute Kidney Injury following Infant Cardiac Surgery
Source: Research Square preprint supplement (doi:10.21203/rs.3.rs-1636183/v1), 2022-05-12

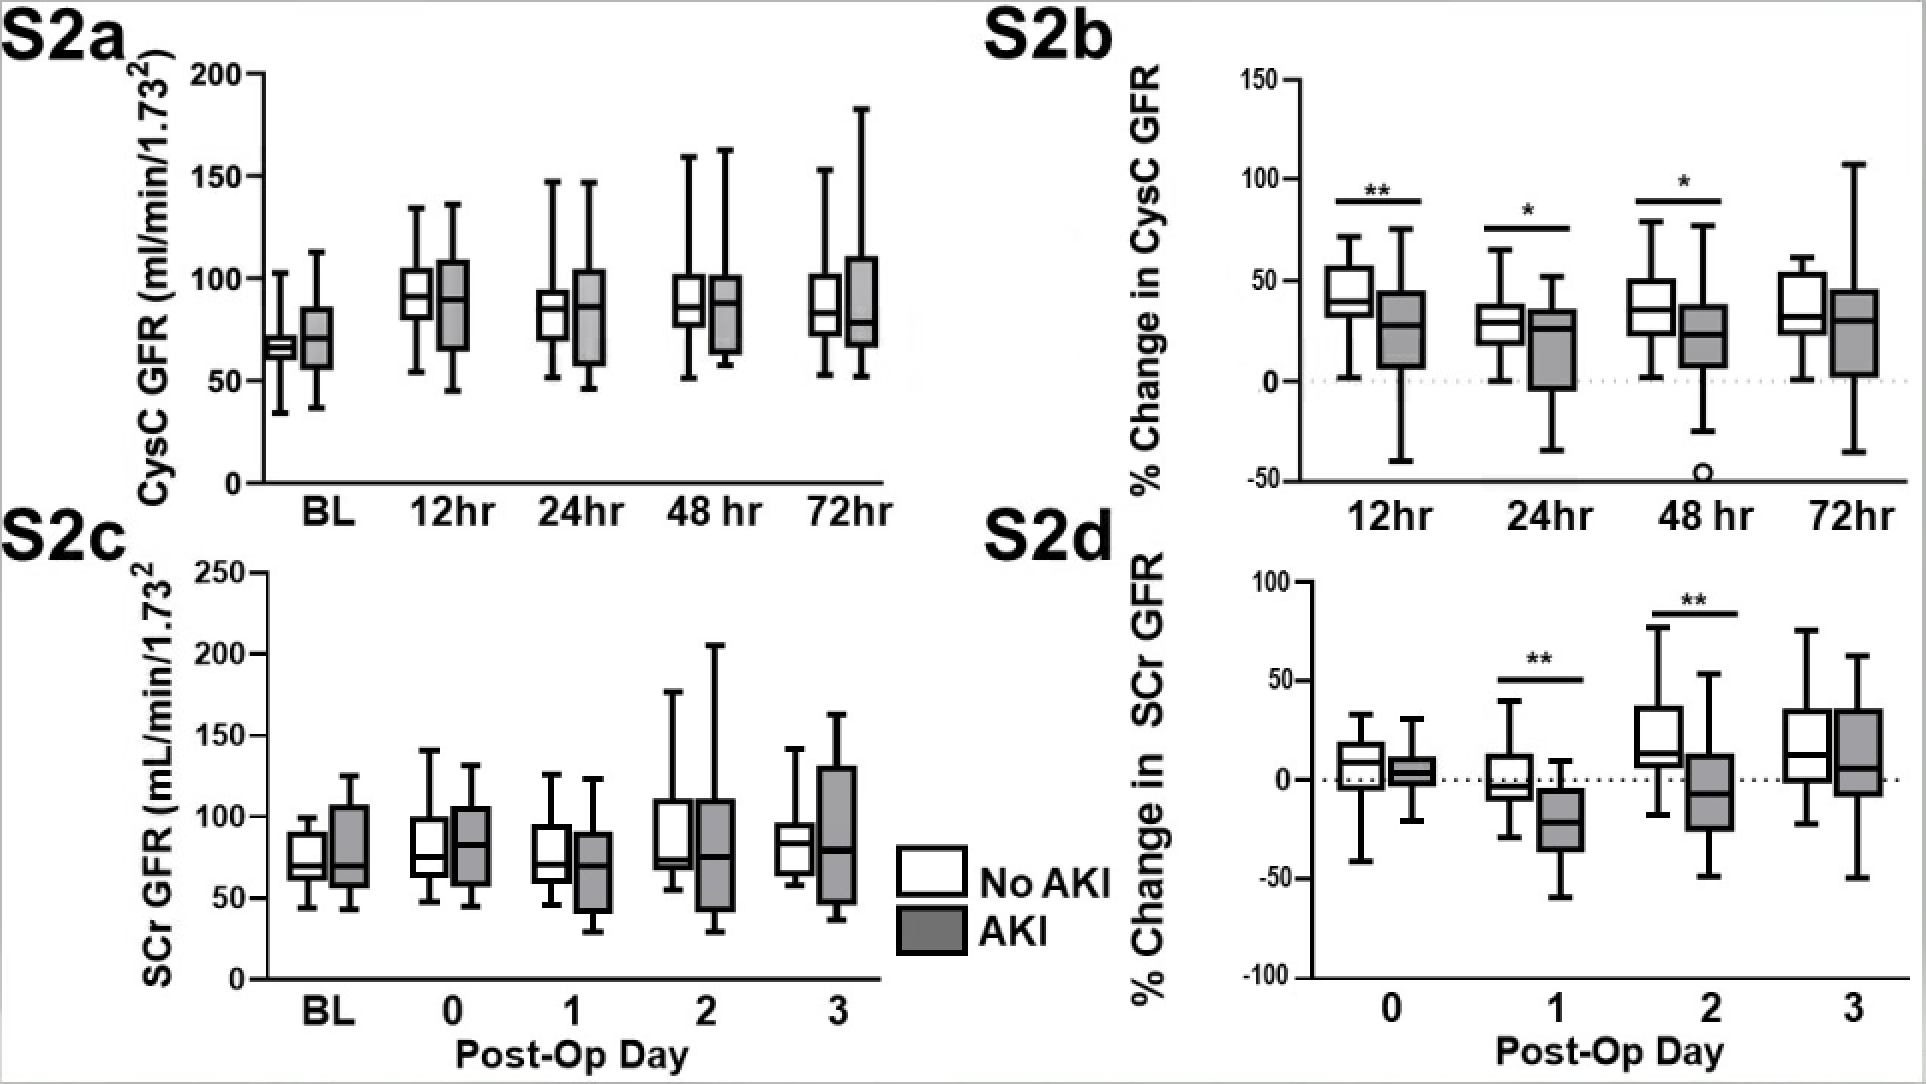

Supplement: Supplementary file 1 [file d4304375ec022bbecaaa32d1.docx]
